# Supplementary material for: Random Forest Model in the Diagnosis of Dementia Patients with Normal Mini-Mental State Examination Scores
Source: J Pers Med. 2022 Jan 4;12(1):37. doi: 10.3390/jpm12010037 (PMC8780625; doi:10.3390/jpm12010037)
Supplement: Supplementary file 1 [file jpm-12-00037-s001.zip › jpm-1500047-supplementary.pdf]

# Supplementary material

**Supplementary Table S1. 64 features that extracted.**

| Number | Features               | Explanation notes                                                             |
|--------|------------------------|-------------------------------------------------------------------------------|
| 1      | Age                    | years                                                                         |
| 2      | Age group              | < 65 years old; 65-85 years old; > 85 years old                               |
| 3      | Gender                 | Male or female                                                                |
| 4      | Education              | years                                                                         |
| 5      | Education group        | ≤ 6 years of education; >6 and ≤12 years of education; >12 years of education |
| 6      | Handedness             | Right-handedness; left-handedness; Mixed- handedness                          |
| 7      | HAD-anxiety            | Anxiety score of Hospital Anxiety and Depression scale                        |
| 8      | HAD-depression         | Depression score of Hospital Anxiety and Depression scale                     |
| 9      | CVF                    | Category verbal fluency                                                       |
| 10     | DST                    | Digit symbol test                                                             |
| 11     | TMT A                  | Trail making test A                                                           |
| 12     | TMT B                  | Trail making test B                                                           |
| 13     | CDT                    | Clock drawing test                                                            |
|        | PAL                    | Paired-associate learning of The Clinical Memory Test                         |
| 14     | PAL N1                 | The first learning trial of PAL                                               |
| 15     | PAL N1- Simple part    | Six simple word pairs of PAL N1                                               |
| 16     | PAL N1- Difficult part | Six difficult word pairs of PAL N1                                            |
| 17     | PAL-N2                 | The second learning trial of PAL                                              |
| 18     | PAL N2- Simple part    | Six simple word pairs of PAL N2                                               |
| 19     | PAL N2- Difficult part | Six difficult word pairs of PAL N2                                            |
| 20     | PAL-N3                 | The third learning trial of PAL                                               |
| 21     | PAL N3- Simple part    | Six simple word pairs of PAL N3                                               |
| 22     | PAL N3- Difficult part | Six difficult word pairs of PAL N3                                            |
| 23     | PAL-T                  | The total score of the three learning trials of PAL                           |
|        | BDT                    | Block design test of the Aphasia Battery of Chinese                           |
| 24     | BDT N1                 | The first figure of BDT                                                       |
| 25     | BDT N2                 | The second figure of BDT                                                      |
| 26     | BDT N3                 | The third figure of BDT                                                       |
| 27     | BDT-T                  | The total score of BDT                                                        |
| 28     | Modified Luria TST     | Modified Luria three-step task                                                |
|        | FC                     | Figure copying of the Aphasia Battery of Chinese                              |
| 29     | FC N1                  | The first figure of FC                                                        |
| 30     | FC N2                  | The second figure of FC                                                       |
| 31     | FC N3                  | The third figure of FC                                                        |
| 32     | FC N4                  | The fourth figure of FC                                                       |
| 33     | FC-T                   | The total score of four figures of FC                                         |
| 34     | Gesture imitation      | Imitation of seven hand gestures                                              |
| 35     | Modified-Rey copy      | Copy of a modified Rey-Osterrieth figure                                      |
| 36     | Speech length          | Sentence length of spontaneous speech                                         |
| 37     | Speech time            | Time of spontaneous speech                                                    |

|    |                          |                                                                 |
|----|--------------------------|-----------------------------------------------------------------|
| 38 | Semantic paraphasia      | "Yes" or "No"                                                   |
| 39 | Phonemic paraphasia      | "Yes" or "No"                                                   |
| 40 | Repetitive language      | "Yes" or "No"                                                   |
| 41 | Word retrieval           | Hesitation and delay in spoken production;"Yes" or "No"         |
| 42 | Language output          | "Fluent" or "nonfluent"                                         |
| 43 | Language comprehension   | Executing five commands                                         |
| 44 | Repetition               | Repeating three sentences                                       |
| 45 | Object naming            | The number of correctly named objects                           |
| 46 | Color naming             | The number of correctly named colors                            |
|    | AVLT                     | Auditory Verbal Learning Test--Huashan version                  |
| 47 | AVLT N1                  | The first learning trial of AVLT-H                              |
| 48 | AVLT N2                  | The second learning trial of AVLT-H                             |
| 49 | AVLT N3                  | The third learning trial AVLT-H                                 |
| 50 | AVLT-L                   | Total score of three learning trials of AVLT-H                  |
| 51 | AVLT N4                  | The fourth short delayed free recall trial of AVLT-H            |
| 52 | AVLT N5                  | The fifth long delayed free recall trial of AVLT-H              |
| 53 | AVLT-T                   | Total score of AVLT-L,AVLT N4 and AVLT N5                       |
| 54 | AVLT N6                  | The sixth delayed category cue recall trial of AVLT-H           |
| 55 | AVLT-RH                  | Recognitions hits of AVLT-H                                     |
| 56 | AVLT-RF                  | Recognitions false of AVLT-H                                    |
|    | LMT                      | logical memory test of modified Wechsler Memory Scale           |
| 57 | LMT N1                   | The first story of LMT                                          |
| 58 | LMT N2                   | The second story of LMT                                         |
| 59 | LMT N3                   | The third story of LMT                                          |
| 60 | LMT-T                    | The total score of LMT                                          |
| 61 | Modified-Rey recall      | Modified Rey-Osterreith figure with a 10-minute free recall     |
| 62 | Modified-Rey Recognition | Recognition of Modified Rey-Osterreith figure;"True" or "false" |
| 63 | Similarities             | Similarities of the Wechsler Adult Intelligence Scale           |
| 64 | Calculations             | Calculations of the Wechsler Adult Intelligence Scale           |

**Supplementary Table S2. Six neuropsychological subtests and they selected features.**

| <b>Number</b> | <b>Neuropsychological subtests</b> | <b>Selected features</b>                                                                                                                                                               |
|---------------|------------------------------------|----------------------------------------------------------------------------------------------------------------------------------------------------------------------------------------|
| 1             | PAL                                | PAL N1<br>PAL N1- Simple part<br>PAL N1- Difficult part<br>PAL-N2<br>PAL N2- Simple part<br>PAL N2- Difficult part<br>PAL-N3<br>PAL N3- Simple part<br>PAL N3- Difficult part<br>PAL-T |
| 2             | AVLT-H                             | AVLT N1<br>AVLT N2<br>AVLT N3<br>AVLT-L<br>AVLT N4<br>AVLT N5<br>AVLT-T                                                                                                                |
| 3             | LMT                                | LMT N2                                                                                                                                                                                 |
| 4             | Modified-Rey figure                | Modified-Rey copy<br>Modified-Rey recall                                                                                                                                               |
| 5             | DST                                | DST                                                                                                                                                                                    |
| 6             | TMT A                              | TMT A                                                                                                                                                                                  |
